# Supplementary material
Source: PubMed Central journal article supplement (PMC3002870)
Supplement: supp_cvq271_cvq271supp.pdf [file supp_cvq271_cvq271supp.pdf]

## **CVR-2010-567R2**

**Supplementary Figure 1 .** Acute central administration of Ex-4 does not alter activity. Mice received either aCSF or Ex-4 through an ICV cannula. (A) Activity was unchanged during acute Ex-4 infusion. (B) Average activity during the dark and light period during the first 24 hours of Ex-4 infusion. Chronic ICV infusion of Ex-4 did not alter activity during either the dark (C) or light (D) periods. Arrow indicates beginning of Ex-4 infusion.

**Supplementary Figure 2 .** Central administration of Ex-4 depresses temperature. Mice received either aCSF or Ex-4 through an ICV cannula. Temperature was significantly depressed. (A) Body temperature throughout the first 24 hours Ex-4 infusion. (B) Average body temperature was diminished during the dark period. Chronic ICV Ex-4 infusion significantly reduced temperature during both the dark (C) and light (D) periods. Arrow indicates beginning of Ex-4 infusion. \* $p < 0.05$ ; \*\*\*  $p < 0.001$ ; significant difference between groups; two-way ANOVA with repeated measures

**Supplementary Figure 3.** Chronic ICV infusion of Ex-4 significantly reduced body weight (A) and blood glucose levels (B) over 28 days. \*  $p < 0.05$ ; two way ANOVA between groups, Bonferroni post-hoc test.

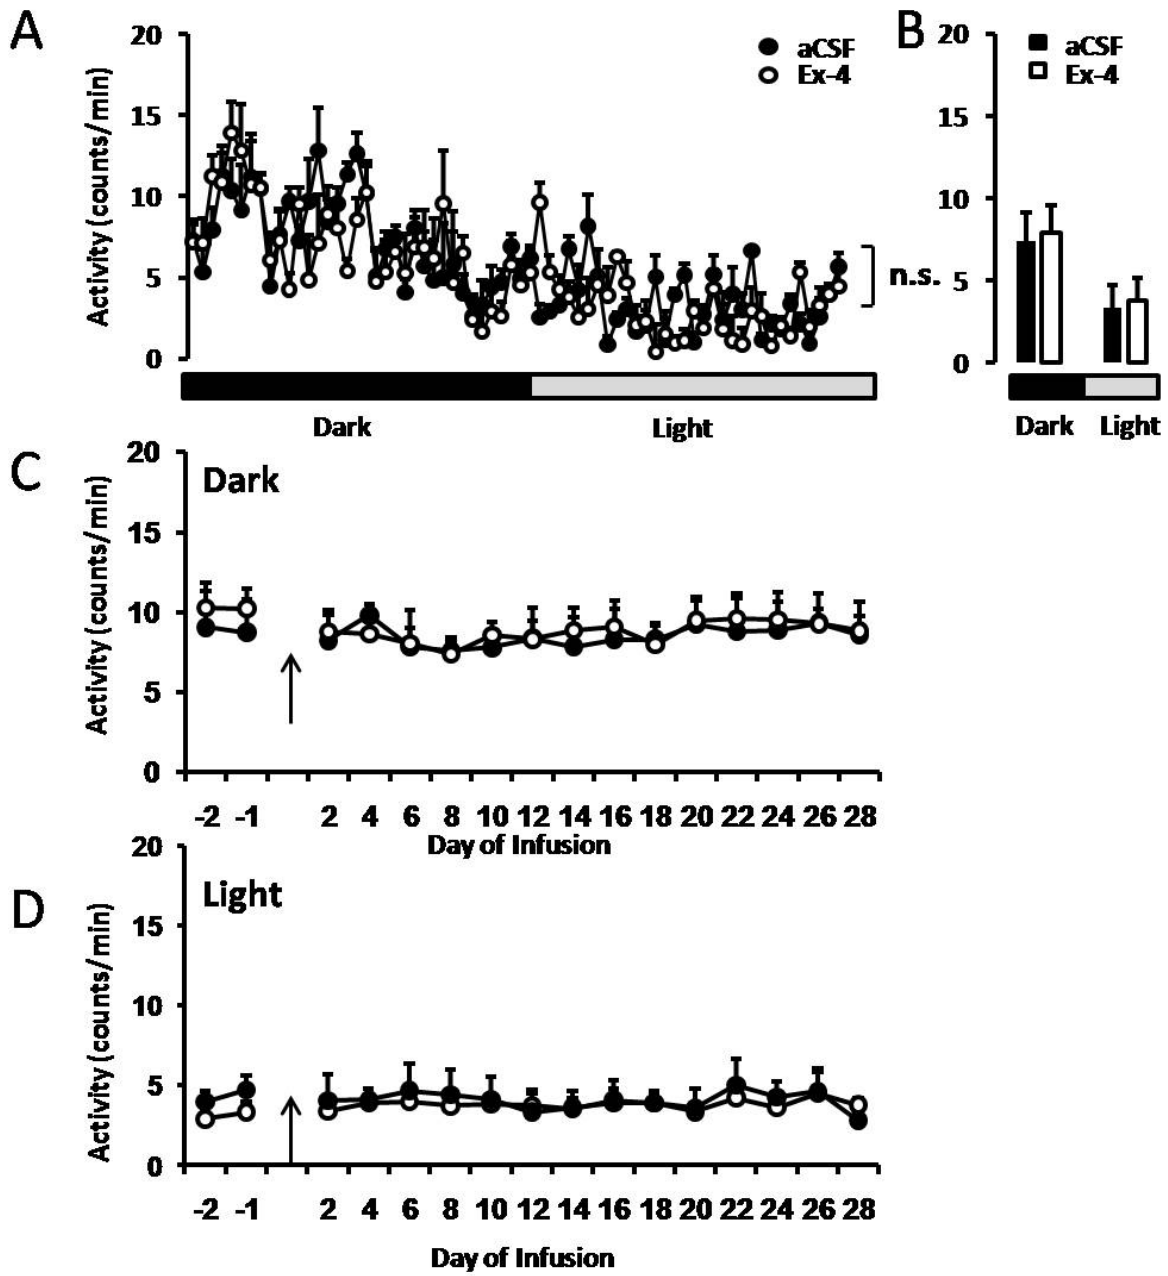

Figure S1

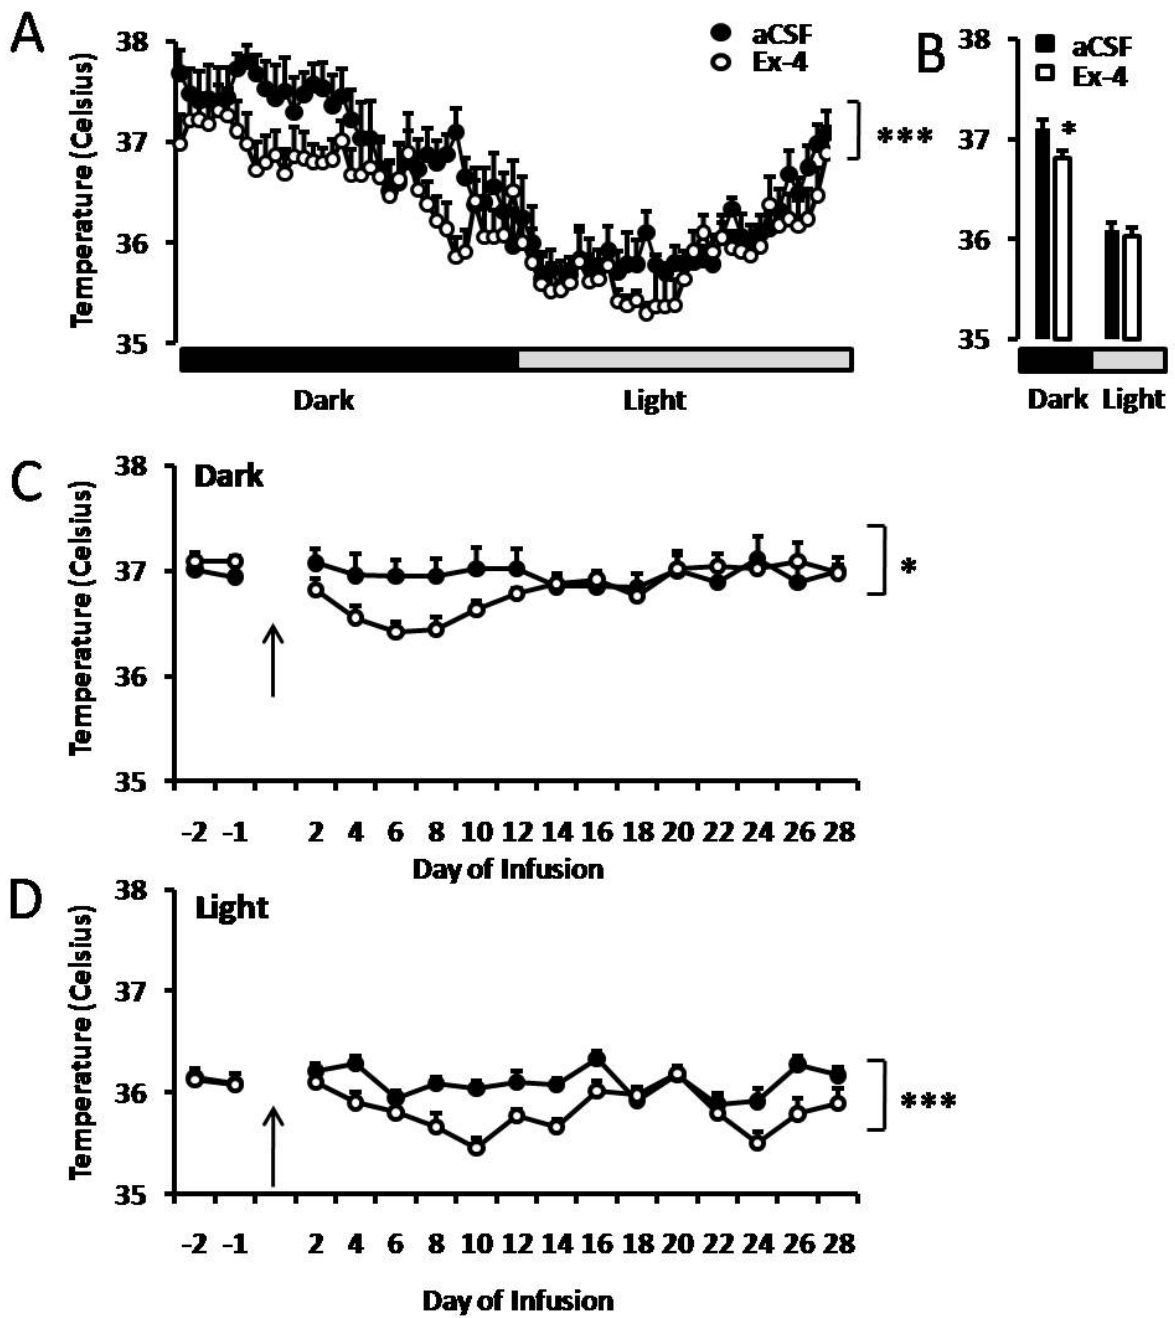

Figure S2

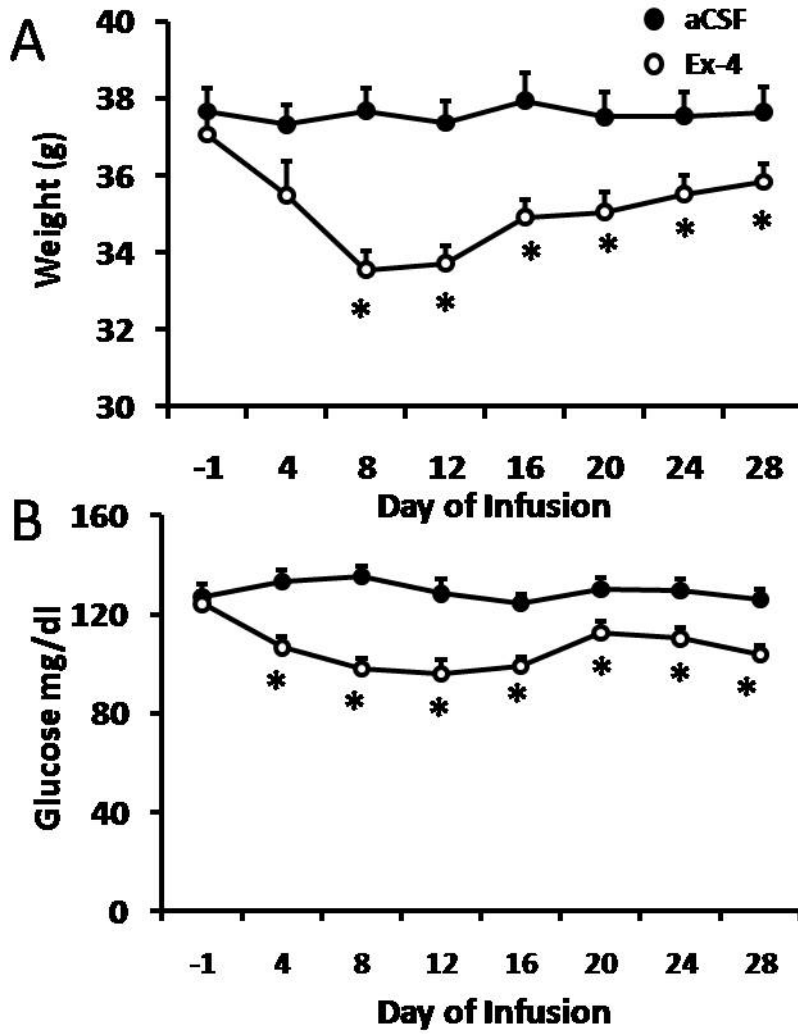

Figure S3
